# Supplementary material
Source: ML conference proceedings conference paper supplement (https://openreview.net/forum?id=StZVqP8sqe5)
Supplement: supplementary_material [file attachment]

---

# Mutation-Driven Follow the Regularized Leader for Last-Iterate Convergence in Zero-Sum Games (Supplementary Material)

---

Kenshi Abe<sup>1</sup>

Mitsuki Sakamoto<sup>2</sup>

Atsushi Iwasaki<sup>2</sup>

<sup>1</sup>CyberAgent, Inc.

<sup>2</sup>University of Electro-Communications

## A UNBIASED ESTIMATOR FOR FTRL AND O-FTRL UNDER BANDIT FEEDBACK

For FTRL and O-FTRL under bandit feedback, we use the following unbiased estimator of  $q_i^{\pi^t}$  which is proposed by [Lattimore and Szepesvári, 2020]:

$$\hat{q}_i^{\pi^t}(a_i) = u_{\max} - \frac{u_{\max} - u_i(a_1^t, a_2^t)}{\pi_i^t(a_i^t)} \mathbb{1}[a_i = a_i^t].$$

This estimator takes values in  $(-\infty, u_{\max}]$  while the standard importance-weighted estimator takes values in  $(-\infty, \infty)$ .

## B SENSITIVITY ANALYSIS ON MUTATION PARAMETERS

In this section, we investigate the performance of M-FTRL with a fixed reference strategy with varying  $\mu \in \{10^{-3}, 5 \times 10^{-3}, 10^{-2}, 10^{-1}, 1\}$ . We set the reference strategy to  $c_i = \left(\frac{1}{|A_i|}\right)_{a_i \in A_i}$ , and set the learning rate to  $\eta = 10^{-1}$ . The initial strategy profile  $\pi^0$  is generated uniformly at random in  $\prod_{i=1}^2 \Delta^\circ(A_i)$  for each instance. We conduct experiments on BRPS under full-information feedback. Figure 1 shows the average exploitability of  $\pi^t$  for 100 instances. This result highlights the trade-off between the convergence rate and exploitability as shown in Theorem 5.4.

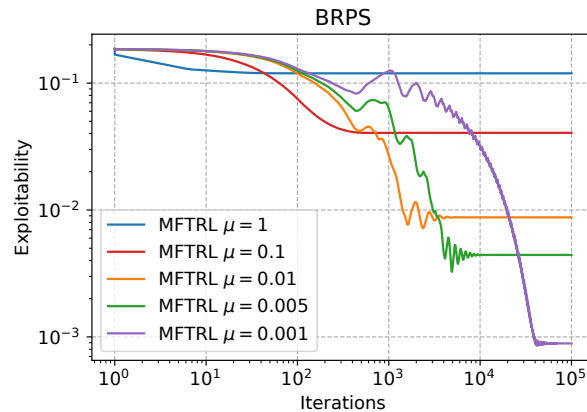

Figure 1: Exploitability of  $\pi^t$  for M-FTRL with a fixed reference strategy in BRPS under full-information feedback.

## C ADDITIONAL LEMMAS

**Lemma C.1.** For any  $\pi \in \prod_{i=1}^2 \Delta(A_i)$ ,  $\pi^t$  updated by M-FTRL satisfies that:

$$D_\psi(\pi, \pi^t) = \sum_{i=1}^2 \left( \max_{p \in \Delta(A_i)} \{ \langle z_i^t, p \rangle - \psi_i(p) \} - \langle z_i^t, \pi_i \rangle + \psi_i(\pi_i) \right).$$

**Lemma C.2.** Let  $\pi^\mu \in \prod_{i=1}^2 \Delta(A_i)$  be a stationary point of (RMD). For a player  $i \in \{1, 2\}$ , if  $c_i \in \Delta^\circ(A_i)$  and  $\mu > 0$ , then we also have  $\pi_i^\mu \in \Delta^\circ(A_i)$ .

## D PROOFS

### D.1 PROOF OF THEOREM 5.1

*Proof of Theorem 5.1.* By the method of Lagrange multiplier, we have:

$$\pi_i^t(a_i) = \frac{\exp(z_i^t(a_i))}{\sum_{a'_i \in A_i} \exp(z_i^t(a'_i))}.$$

Therefore, the time derivative of  $\pi_i^t(a_i)$  is given as follows:

$$\begin{aligned} \frac{d}{dt} \pi_i^t(a_i) &= \frac{\frac{d}{dt} \exp(z_i^t(a_i))}{\sum_{a'_i \in A_i} \exp(z_i^t(a'_i))} - \frac{\exp(z_i^t(a_i)) \frac{d}{dt} \left( \sum_{a'_i \in A_i} \exp(z_i^t(a'_i)) \right)}{\left( \sum_{a'_i \in A_i} \exp(z_i^t(a'_i)) \right)^2} \\ &= \frac{\exp(z_i^t(a_i)) \frac{d}{dt} z_i^t(a_i)}{\sum_{a'_i \in A_i} \exp(z_i^t(a'_i))} - \frac{\exp(z_i^t(a_i)) \left( \sum_{a'_i \in A_i} \exp(z_i^t(a'_i)) \frac{d}{dt} z_i^t(a'_i) \right)}{\left( \sum_{a'_i \in A_i} \exp(z_i^t(a'_i)) \right)^2} \\ &= \pi_i^t(a_i) \frac{d}{dt} z_i^t(a_i) - \pi_i^t(a_i) \sum_{a'_i \in A_i} \pi_i^t(a'_i) \frac{d}{dt} z_i^t(a'_i). \end{aligned}$$

From the definition of  $z_i^t(a_i)$ , we have:

$$\frac{d}{dt} z_i^t(a_i) = q_i^{\pi^t}(a_i) + \frac{\mu}{\pi_i^t(a_i)} (c_i(a_i) - \pi_i^t(a_i)).$$

By combining these equalities, we get:

$$\begin{aligned} \frac{d}{dt} \pi_i^t(a_i) &= \pi_i^t(a_i) \left( q_i^{\pi^t}(a_i) + \frac{\mu}{\pi_i^t(a_i)} (c_i(a_i) - \pi_i^t(a_i)) - \sum_{a'_i \in A_i} \pi_i^t(a'_i) \left( q_i^{\pi^t}(a'_i) + \frac{\mu}{\pi_i^t(a'_i)} (c_i(a'_i) - \pi_i^t(a'_i)) \right) \right) \\ &= \pi_i^t(a_i) \left( q_i^{\pi^t}(a_i) - v_i^{\pi^t} \right) + \mu (c_i(a_i) - \pi_i^t(a_i)) - \mu \pi_i^t(a_i) \sum_{a'_i \in A_i} (c_i(a'_i) - \pi_i^t(a'_i)) \\ &= \pi_i^t(a_i) \left( q_i^{\pi^t}(a_i) - v_i^{\pi^t} \right) + \mu (c_i(a_i) - \pi_i^t(a_i)). \end{aligned}$$

□

## D.2 PROOF OF LEMMA 5.5

*Proof of Lemma 5.5.* Let us define  $\psi_i^*(z_i) = \max_{p \in \Delta(A_i)} \{\langle z_i, p \rangle - \psi_i(p)\}$ . Then, from Lemma C.1, the time derivative of  $D_\psi(\pi, \pi^t)$  is given as:

$$\begin{aligned} \frac{d}{dt} D_\psi(\pi, \pi^t) &= \sum_{i=1}^2 \frac{d}{dt} \left( \max_{p \in \Delta(A_i)} \{\langle z_i^t, p \rangle - \psi_i(p)\} - \langle z_i^t, \pi_i \rangle + \psi_i(\pi_i) \right) \\ &= \sum_{i=1}^2 \frac{d}{dt} (\psi_i^*(z_i^t) - \langle z_i^t, \pi_i \rangle) \\ &= \sum_{i=1}^2 \left( \left\langle \frac{d}{dt} z_i^t, \nabla \psi_i^*(z_i^t) \right\rangle - \left\langle \frac{d}{dt} z_i^t, \pi_i \right\rangle \right) \\ &= \sum_{i=1}^2 \left\langle \frac{d}{dt} z_i^t, \nabla \psi_i^*(z_i^t) - \pi_i \right\rangle. \end{aligned}$$

From the maximizing argument of [Shalev-Shwartz, 2011], we have  $\nabla \psi_i^*(z_i) = \arg \max_{p \in \Delta(A_i)} \{\langle z_i, p \rangle - \psi_i(p)\}$  and then  $\nabla \psi_i^*(z_i^t) = \pi_i^t$ . Furthermore, from the definition of  $z_i^t(a_i)$ , we have  $\frac{d}{dt} z_i^t(a_i) = q_i^{\pi^t}(a_i) + \frac{\mu}{\pi_i^t(a_i)} (c_i(a_i) - \pi_i^t(a_i))$ . Then,

$$\begin{aligned} \frac{d}{dt} D_\psi(\pi, \pi^t) &= \sum_{i=1}^2 \left\langle \frac{d}{dt} z_i^t, \pi_i^t - \pi_i \right\rangle \\ &= \sum_{i=1}^2 \sum_{a_i \in A_i} \left( q_i^{\pi^t}(a_i) + \frac{\mu}{\pi_i^t(a_i)} (c_i(a_i) - \pi_i^t(a_i)) \right) (\pi_i^t(a_i) - \pi_i(a_i)) \\ &= \sum_{i=1}^2 \sum_{a_i \in A_i} (\pi_i^t(a_i) - \pi_i(a_i)) \left( q_i^{\pi^t}(a_i) + \mu \left( \frac{c_i(a_i)}{\pi_i^t(a_i)} - 1 \right) \right) \\ &= \sum_{i=1}^2 \sum_{a_i \in A_i} (\pi_i^t(a_i) - \pi_i(a_i)) \left( q_i^{\pi^t}(a_i) + \mu \frac{c_i(a_i)}{\pi_i^t(a_i)} \right) \\ &= \sum_{i=1}^2 \left( v_i^{\pi_i^t} - v_i^{\pi_i, \pi_i^t} + \mu \sum_{a_i \in A_i} (\pi_i^t(a_i) - \pi_i(a_i)) \frac{c_i(a_i)}{\pi_i^t(a_i)} \right) \\ &= - \sum_{i=1}^2 v_i^{\pi_i, \pi_i^t} + 2\mu - \mu \sum_{i=1}^2 \sum_{a_i \in A_i} c_i(a_i) \frac{\pi_i(a_i)}{\pi_i^t(a_i)} \\ &= \sum_{i=1}^2 v_i^{\pi_i^t, \pi_i} + 2\mu - \mu \sum_{i=1}^2 \sum_{a_i \in A_i} c_i(a_i) \frac{\pi_i(a_i)}{\pi_i^t(a_i)}, \end{aligned}$$

where the sixth equality follows from  $\sum_{i=1}^2 v_i^{\pi_i^t} = 0$  and  $\mu \sum_{a \in A} \pi_i^t(a_i) \frac{c_i(a_i)}{\pi_i^t(a_i)} = \mu \sum_{a \in A} c_i(a_i) = \mu$ , and the last equality follows from  $v_1^{\pi_1, \pi_2^t} = -v_2^{\pi_1, \pi_2^t}$  and  $v_2^{\pi_1^t, \pi_2} = -v_1^{\pi_1^t, \pi_2}$  by the definition of two-player zero-sum games.  $\square$

## D.3 PROOF OF LEMMA 5.6

*Proof of Lemma 5.6.* By using the ordinary differential equation (RMD), we have for all  $i \in \{1, 2\}$  and  $a_i \in A_i$ :

$$\pi_i^\mu(a_i) \left( q_i^{\pi^\mu}(a_i) - v_i^{\pi^\mu} \right) + \mu (c_i(a_i) - \pi_i^\mu(a_i)) = 0.$$

Then, we get:

$$q_i^{\pi^\mu}(a_i) = v_i^{\pi^\mu} - \frac{\mu}{\pi_i^\mu(a_i)} (c_i(a_i) - \pi_i^\mu(a_i)).$$

Note that from Lemma C.2,  $\frac{1}{\pi_i^\mu(a_i)}$  is well-defined. Then, for any  $\pi'_i \in \Delta(A_i)$  we have:

$$\begin{aligned} v_i^{\pi'_i, \pi_i^\mu} &= \sum_{a_i \in A_i} \pi'_i(a_i) q_i^{\pi_i^\mu}(a_i) \\ &= v_i^{\pi_i^\mu} - \mu \sum_{a_i \in A_i} \frac{\pi'_i(a_i)}{\pi_i^\mu(a_i)} (c_i(a_i) - \pi_i^\mu(a_i)) \\ &= v_i^{\pi_i^\mu} + \mu - \mu \sum_{a_i \in A_i} c_i(a_i) \frac{\pi'_i(a_i)}{\pi_i^\mu(a_i)}. \end{aligned}$$

□

#### D.4 PROOF OF THEOREM 5.2

*Proof of Theorem 5.2.* First, we prove the first part of the theorem. By setting  $\pi = \pi^\mu$  in Lemma 5.5 and  $\pi' = \pi^t$  in Lemma 5.6, we have:

$$\begin{aligned} \frac{d}{dt} D_\psi(\pi^\mu, \pi^t) &= \sum_{i=1}^2 v_i^{\pi_i^t, \pi_i^\mu} + 2\mu - \mu \sum_{i=1}^2 \sum_{a_i \in A_i} c_i(a_i) \frac{\pi_i^\mu(a_i)}{\pi_i^t(a_i)} \\ &= \sum_{i=1}^2 v_i^{\pi_i^\mu} + 4\mu - \mu \sum_{i=1}^2 \sum_{a_i \in A_i} c_i(a_i) \left( \frac{\pi_i^t(a_i)}{\pi_i^\mu(a_i)} + \frac{\pi_i^\mu(a_i)}{\pi_i^t(a_i)} \right) \\ &= 4\mu - \mu \sum_{i=1}^2 \sum_{a_i \in A_i} c_i(a_i) \left( \frac{\pi_i^t(a_i)}{\pi_i^\mu(a_i)} + \frac{\pi_i^\mu(a_i)}{\pi_i^t(a_i)} \right) \\ &= 4\mu - \mu \sum_{i=1}^2 \sum_{a_i \in A_i} c_i(a_i) \left( \left( \sqrt{\frac{\pi_i^t(a_i)}{\pi_i^\mu(a_i)}} - \sqrt{\frac{\pi_i^\mu(a_i)}{\pi_i^t(a_i)}} \right)^2 + 2 \right) \\ &= -\mu \sum_{i=1}^2 \sum_{a_i \in A_i} c_i(a_i) \left( \sqrt{\frac{\pi_i^t(a_i)}{\pi_i^\mu(a_i)}} - \sqrt{\frac{\pi_i^\mu(a_i)}{\pi_i^t(a_i)}} \right)^2, \end{aligned}$$

where the third equality follows from  $\sum_{i=1}^2 v_i^{\pi_i^\mu} = 0$  by the definition of zero-sum games.

Next, we prove the second part of the theorem. From the first part of the theorem, we have:

$$\begin{aligned} \frac{d}{dt} D_\psi(\pi^\mu, \pi^t) &= -\mu \sum_{i=1}^2 \sum_{a_i \in A_i} c_i(a_i) \left( \frac{\pi_i^t(a_i)}{\pi_i^\mu(a_i)} + \frac{\pi_i^\mu(a_i)}{\pi_i^t(a_i)} - 2 \right) \\ &\leq -\mu \sum_{i=1}^2 \left( \min_{a_i \in A_i} \frac{c_i(a_i)}{\pi_i^\mu(a_i)} \right) \sum_{a_i \in A_i} \pi_i^\mu(a_i) \left( \frac{\pi_i^t(a_i)}{\pi_i^\mu(a_i)} + \frac{\pi_i^\mu(a_i)}{\pi_i^t(a_i)} - 2 \right) \\ &= -\mu \sum_{i=1}^2 \left( \min_{a_i \in A_i} \frac{c_i(a_i)}{\pi_i^\mu(a_i)} \right) \sum_{a_i \in A_i} \frac{(\pi_i^t(a_i) - \pi_i^\mu(a_i))^2}{\pi_i^t(a_i)} \\ &\leq -\mu \sum_{i=1}^2 \left( \min_{a_i \in A_i} \frac{c_i(a_i)}{\pi_i^\mu(a_i)} \right) \ln \left( 1 + \sum_{a_i \in A_i} \frac{(\pi_i^t(a_i) - \pi_i^\mu(a_i))^2}{\pi_i^t(a_i)} \right) \\ &= -\mu \sum_{i=1}^2 \left( \min_{a_i \in A_i} \frac{c_i(a_i)}{\pi_i^\mu(a_i)} \right) \ln \left( \sum_{a_i \in A_i} \pi_i^\mu(a_i) \frac{\pi_i^\mu(a_i)}{\pi_i^t(a_i)} \right) \\ &\leq -\mu \sum_{i=1}^2 \left( \min_{a_i \in A_i} \frac{c_i(a_i)}{\pi_i^\mu(a_i)} \right) \sum_{a_i \in A_i} \pi_i^\mu(a_i) \ln \left( \frac{\pi_i^\mu(a_i)}{\pi_i^t(a_i)} \right) \\ &= -\mu \sum_{i=1}^2 \left( \min_{a_i \in A_i} \frac{c_i(a_i)}{\pi_i^\mu(a_i)} \right) \text{KL}(\pi_i^\mu, \pi_i^t) \leq -\mu \left( \min_{i \in \{1,2\}, a_i \in A_i} \frac{c_i(a_i)}{\pi_i^\mu(a_i)} \right) \sum_{i=1}^2 \text{KL}(\pi_i^\mu, \pi_i^t), \quad (1) \end{aligned}$$

where the second inequality follows from  $x \geq \ln(1+x)$  for all  $x > 0$ , and the third inequality follows from the concavity of the  $\ln(\cdot)$  function and Jensen's inequality for concave functions. On the other hand, when  $\psi_i(p) = \sum_{a_i \in A_i} p(a_i) \ln p(a_i)$ ,  $D_{\psi_i}(\pi_i^\mu, \pi_i^t) = \text{KL}(\pi_i^\mu, \pi_i^t)$ . Thus, we have  $D_\psi(\pi^\mu, \pi^t) = \sum_{i=1}^2 \text{KL}(\pi_i^\mu, \pi_i^t)$ . From this fact and (1), we have:

$$\frac{d}{dt} \text{KL}(\pi^\mu, \pi^t) \leq -\mu \left( \min_{i \in \{1,2\}, a_i \in A_i} \frac{c_i(a_i)}{\pi_i^\mu(a_i)} \right) \text{KL}(\pi^\mu, \pi^t).$$

□

## E PROOFS OF ADDITIONAL LEMMAS

### E.1 PROOF OF LEMMA C.1

*Proof of Lemma C.1.* First, for any  $\pi \in \prod_{i=1}^2 \Delta(A_i)$ ,

$$D_\psi(\pi, \pi^t) = \sum_{i=1}^2 D_{\psi_i}(\pi_i, \pi_i^t) = \sum_{i=1}^2 (\psi_i(\pi_i) - \psi_i(\pi_i^t) - \langle \nabla \psi_i(\pi_i^t), \pi_i - \pi_i^t \rangle). \quad (2)$$

From the assumptions on  $\psi_i$  and the first-order necessary conditions for the optimization problem of  $\arg \max_{p \in \Delta(A_i)} \{\langle z_i^t, p \rangle - \psi_i(p)\}$ , for  $\pi_i^t = \arg \max_{p \in \Delta(A_i)} \{\langle z_i^t, p \rangle - \psi_i(p)\}$ , there exists  $\lambda \in \mathbb{R}$  such that

$$z_i^t - \nabla \psi_i(\pi_i^t) = \lambda \mathbf{1}.$$

Therefore, we have:

$$\langle z_i^t, \pi_i - \pi_i^t \rangle = \langle \lambda \mathbf{1} + \nabla \psi_i(\pi_i^t), \pi_i - \pi_i^t \rangle = \langle \nabla \psi_i(\pi_i^t), \pi_i - \pi_i^t \rangle. \quad (3)$$

By combining (2) and (3):

$$\begin{aligned} D_\psi(\pi, \pi^t) &= \sum_{i=1}^2 (\psi_i(\pi_i) - \psi_i(\pi_i^t) - \langle z_i^t, \pi_i - \pi_i^t \rangle) \\ &= \sum_{i=1}^2 (\langle z_i^t, \pi_i^t \rangle - \psi_i(\pi_i^t) - \langle z_i^t, \pi_i \rangle + \psi_i(\pi_i)) \\ &= \sum_{i=1}^2 \left( \max_{p \in \Delta(A_i)} \{\langle z_i^t, p \rangle - \psi_i(p)\} - \langle z_i^t, \pi_i \rangle + \psi_i(\pi_i) \right). \end{aligned}$$

□

### E.2 PROOF OF LEMMA C.2

*Proof of Lemma C.2.* We assume that there exists  $i \in \{1, 2\}$  and  $a_i \in A_i$  such that  $\pi_i^\mu(a_i) = 0$ . Then, for such  $i$  and  $a_i$ , we have:

$$\frac{d}{dt} \pi_i^\mu(a_i) = \pi_i^\mu(a_i) (q_i^{\pi^\mu}(a_i) - v_i^{\pi^\mu}) + \mu (c_i(a_i) - \pi_i^\mu(a_i)) = \mu c_i(a_i) > 0.$$

This contradicts that  $\frac{d}{dt} \pi_i^\mu(a_i) = 0$  since  $\pi^\mu$  is a stationary point. Therefore, for all  $i \in \{1, 2\}$  and  $a_i \in A_i$ , we have  $\pi_i^\mu(a_i) > 0$ . □

## References

- Tor Lattimore and Csaba Szepesvári. *Bandit algorithms*. Cambridge University Press, 2020.
- Shai Shalev-Shwartz. Online learning and online convex optimization. *Foundations and trends in Machine Learning*, 4(2): 107–194, 2011.
